# Supplementary material for: High-efficiency self-powered perovskite photodetector with an electron-enhancing SnO2/WS2 double electron transport layer
Source: Royal Society of Chemistry journal article supplement (doi:10.1039/d4tc04208e), 2024-12-16
Supplement: d4tc04208e1.pdf [file d4tc04208e1.pdf]

## SUPPORTING INFORMATION

# High-efficiency self-powered perovskite photodetector with electron-enhancing SnO<sub>2</sub>/WS<sub>2</sub> double electron transport layer

Vo Pham Hoang Huy, Chung Wung Bark<sup>1,\*</sup>

<sup>1</sup>Department of Electrical Engineering, Gachon University, Seongnam, Gyeonggi 13120, Republic of Korea.

\*Correspondence: bark@gachon.ac.kr

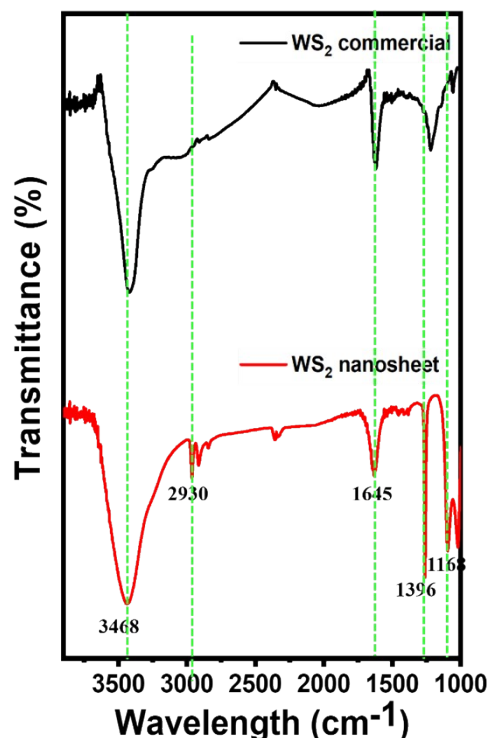

**Fig. S1.** FT-IR of WS<sub>2</sub> commercial and WS<sub>2</sub> nanosheet

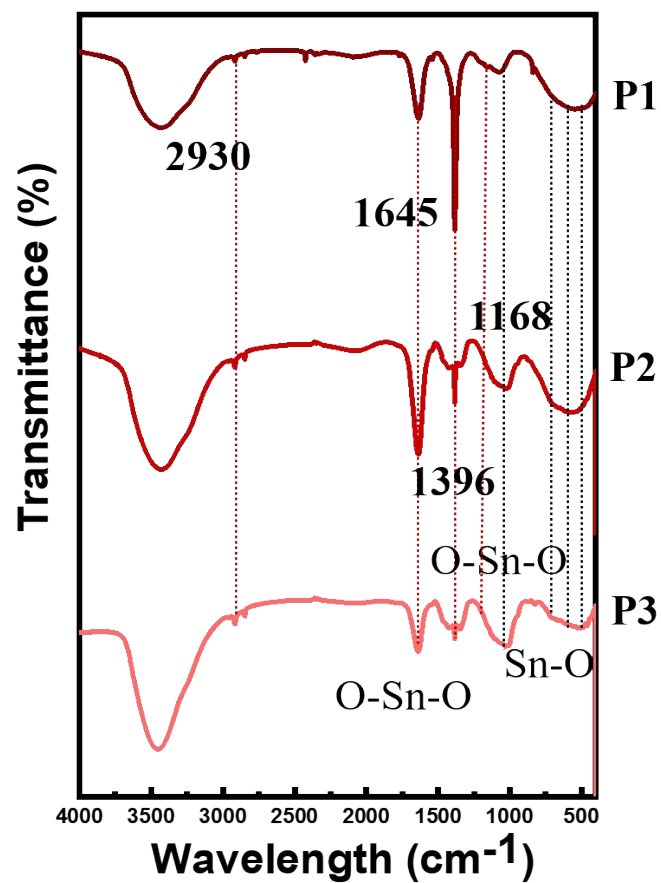

**Fig. S2.** FTIR of SnO<sub>2</sub>-WS<sub>2</sub> at P1, P2, and P3 conditions

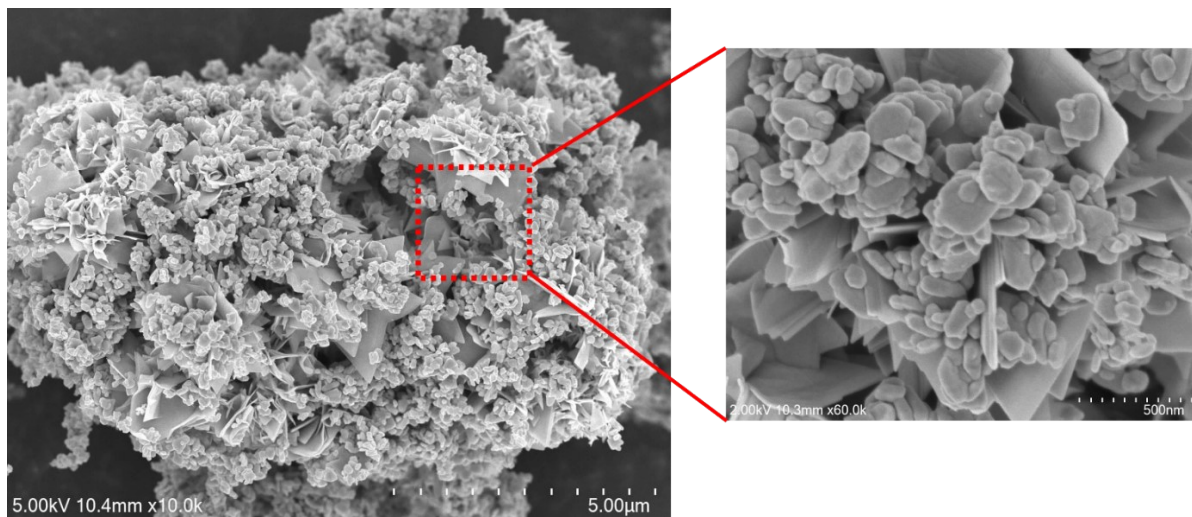

**Fig. S3.** SEM image of WS<sub>2</sub> commercial

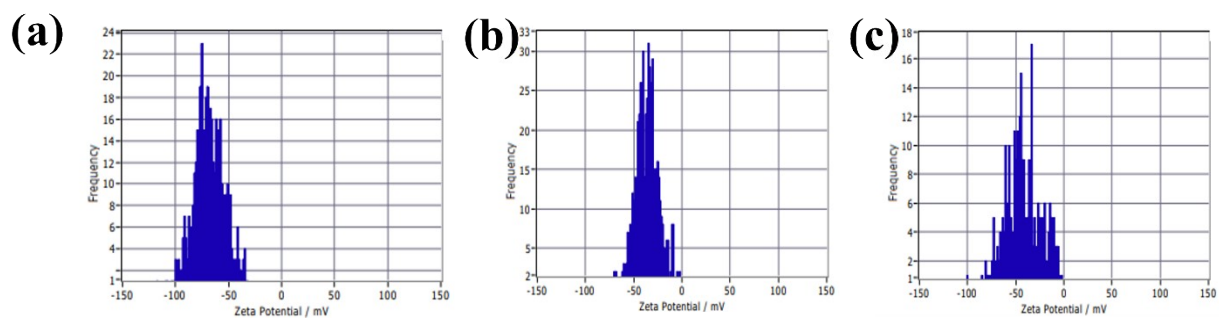

**Fig. S4.** Zeta potential of (a) SnO<sub>2</sub>, (b) WS<sub>2</sub>, (c)SnO<sub>2</sub>-WS<sub>2</sub>

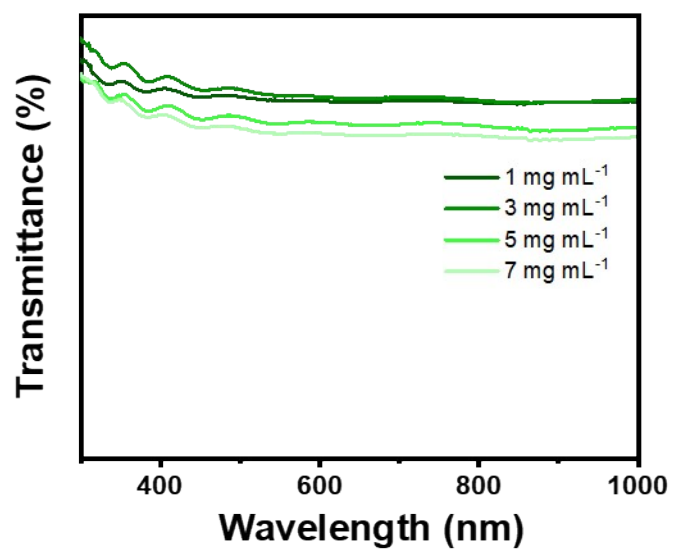

**Fig. S5.** Transmittance of WS<sub>2</sub> at different concentrations.

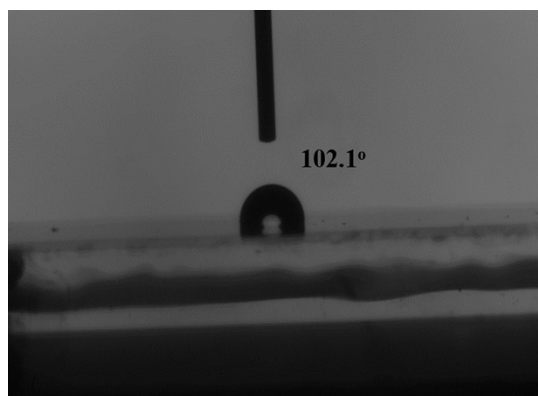

**Fig. S6.** Contact angel measurment of WS<sub>2</sub>

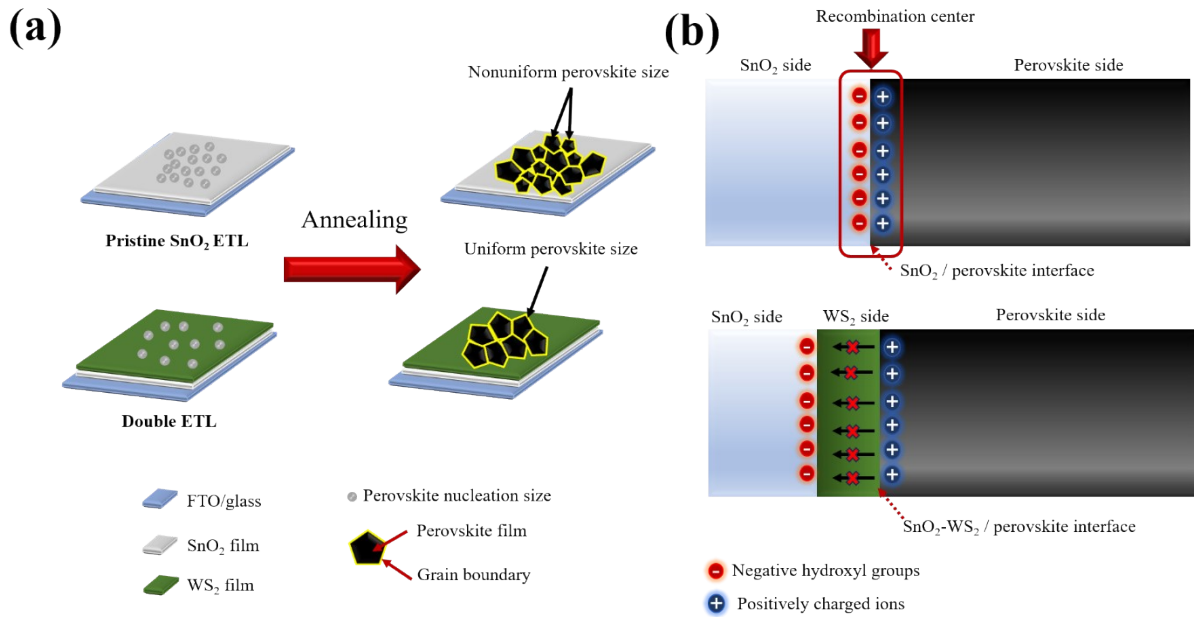

**Fig. S7.** (a) Schematic illustration of the nucleation of perovskite on pristine  $\text{SnO}_2$  and  $\text{SnO}_2/\text{WS}_2$  ETL, (b) Schematic illustration of the formation of recombination center between negative hydroxyl groups from  $\text{SnO}_2$  side and positively charge ions from perovskite in the structure with and without the presence of  $\text{WS}_2$

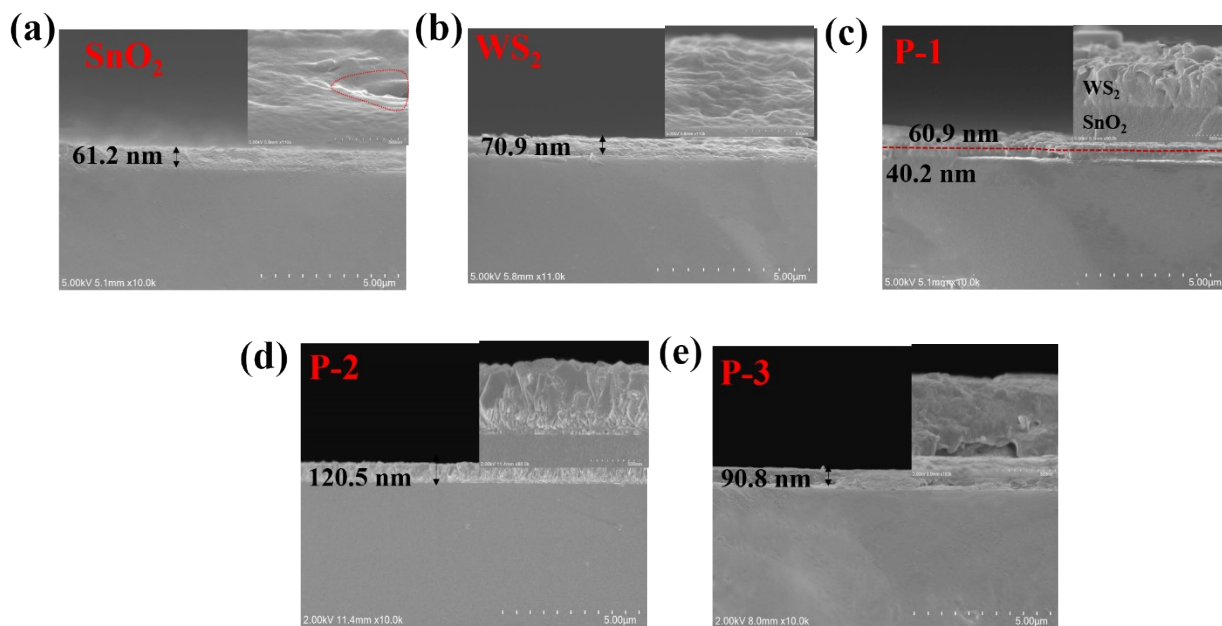

**Fig. S8.** (a) Cross-section SEM image of (a) FTO/SnO<sub>2</sub>, (b) FTO/WS<sub>2</sub>, (c) FTO/SnO<sub>2</sub>-WS<sub>2</sub> (P1), (d) FTO/SnO<sub>2</sub>-WS<sub>2</sub> (P2), (e) FTO/SnO<sub>2</sub>-WS<sub>2</sub> (P3)

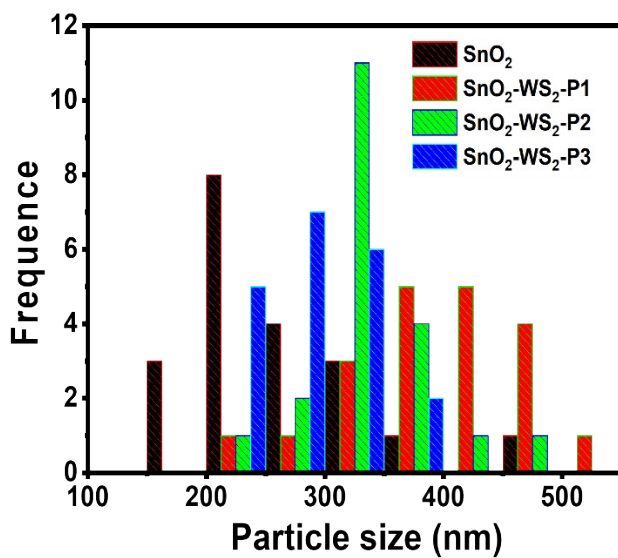

**Fig. S9.** Particle size distribution on SnO<sub>2</sub>, SnO<sub>2</sub>-WS<sub>2</sub> (P1), SnO<sub>2</sub>-WS<sub>2</sub> (P2), and SnO<sub>2</sub>-WS<sub>2</sub> (P3)

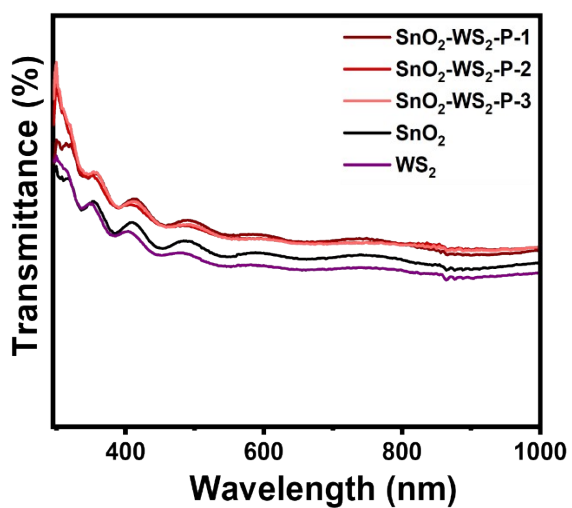

Fig. S10. Transmittance of SnO<sub>2</sub>, WS<sub>2</sub>, SnO<sub>2</sub>-WS<sub>2</sub> (P1), SnO<sub>2</sub>-WS<sub>2</sub> (P2), and SnO<sub>2</sub>-WS<sub>2</sub> (P3)

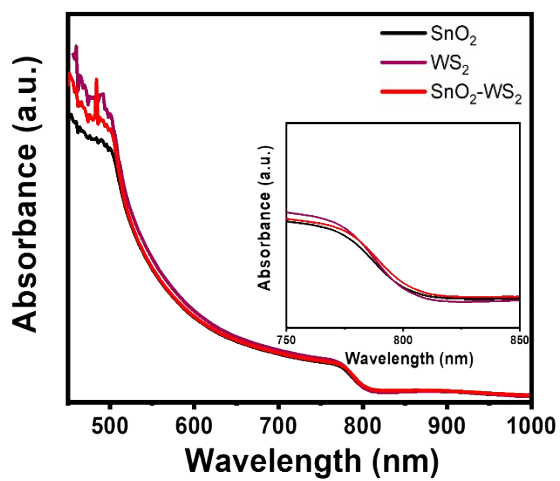

Fig. S11. Absorbance of perovskite on different ETLs

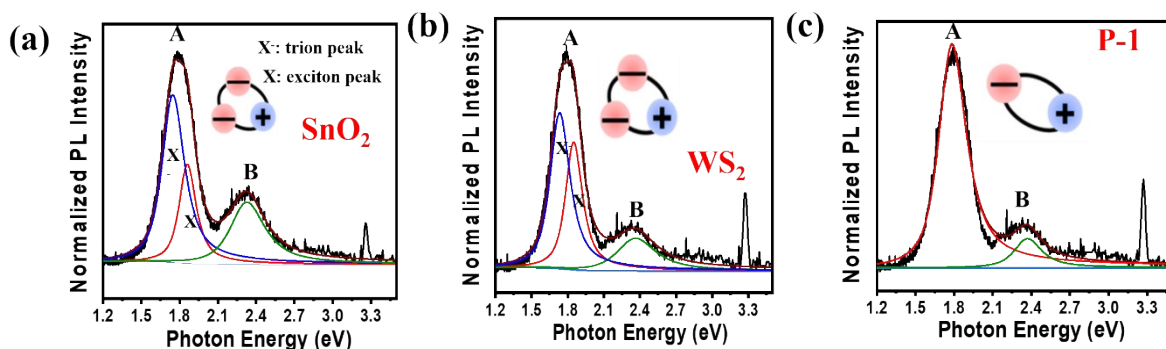

**Fig. S12.** Analysis of the PL spectral shapes for (a)  $\text{SnO}_2$ , (b)  $\text{WS}_2$ , and (c) as-prepared  $\text{SnO}_2$ - $\text{WS}_2$ -P1. The A peaks in the PL spectra were reproduced by assuming two peaks with Lorentzian functions, corresponding to the trion ( $X^-$ ) and the exciton ( $X$ ) peaks.

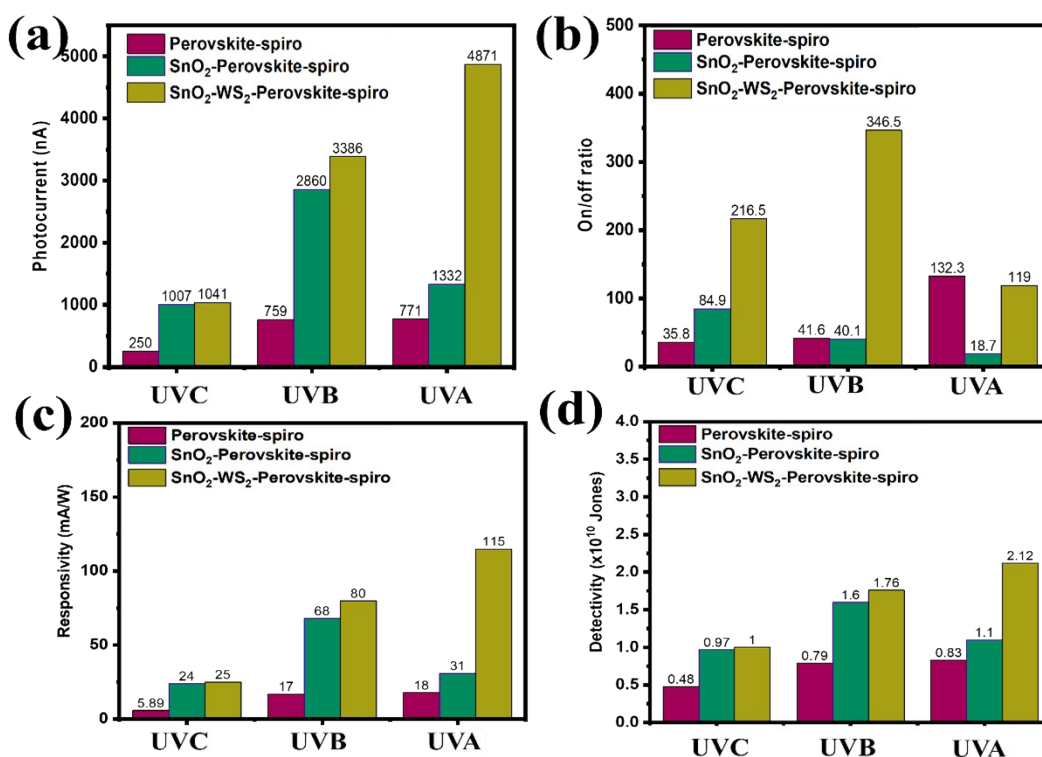

**Fig. S13.** The performance of different PD devices with (a) Time-domain response (b) on/off ratio, (c) responsivity, and (d) detectivity



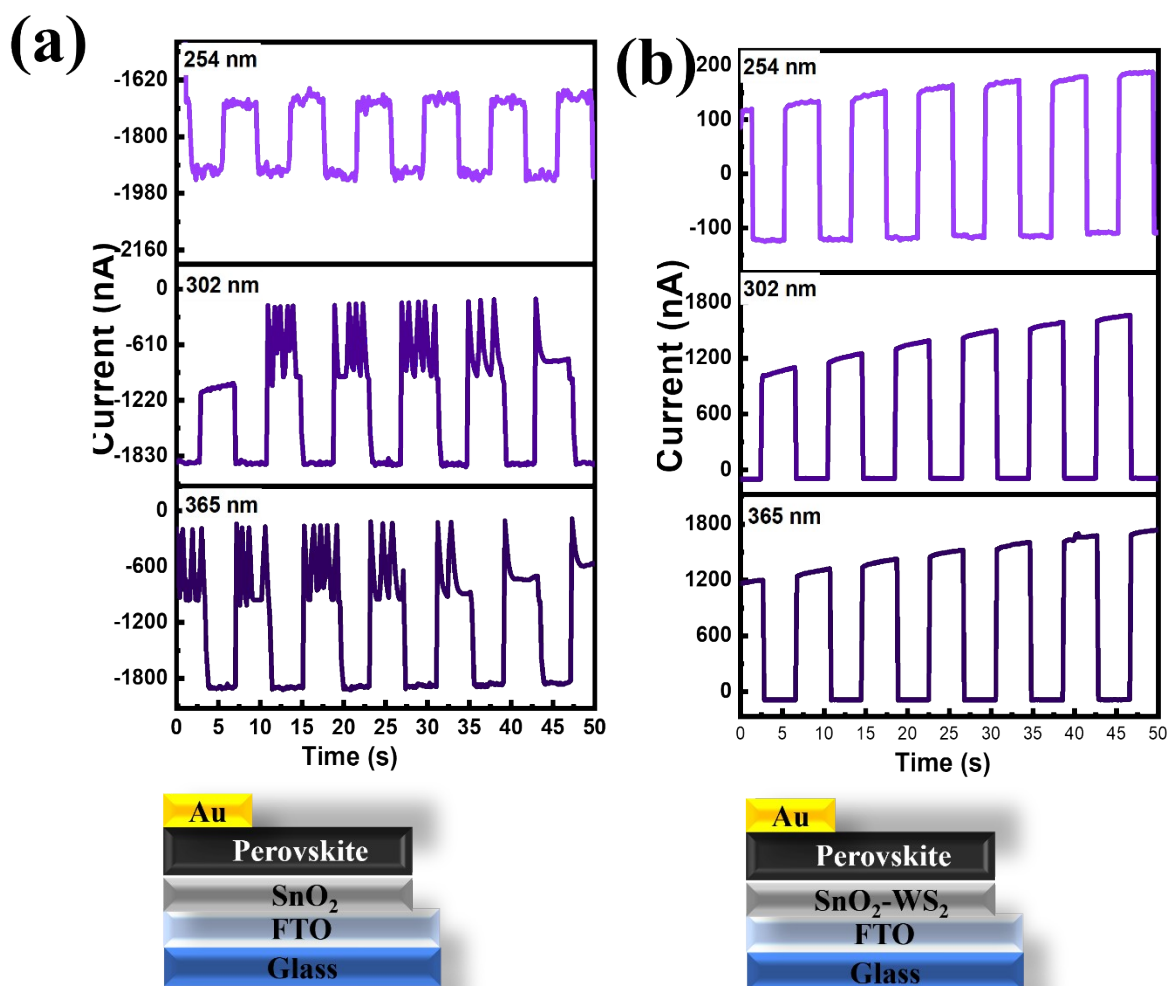

Fig. S14. Time-domain response of different PD device without HTL

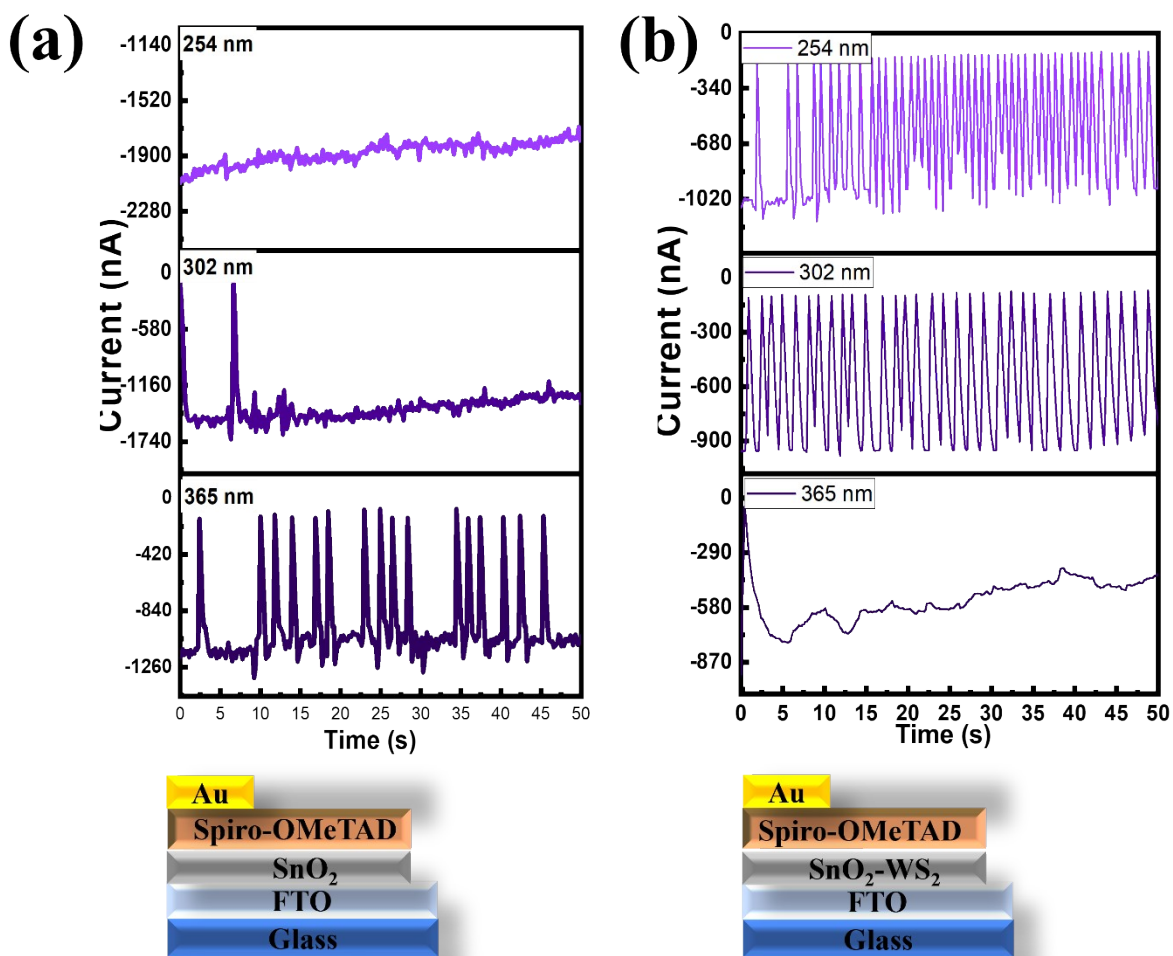

**Fig. S15.** Time-domain response of different PD device without photoactive

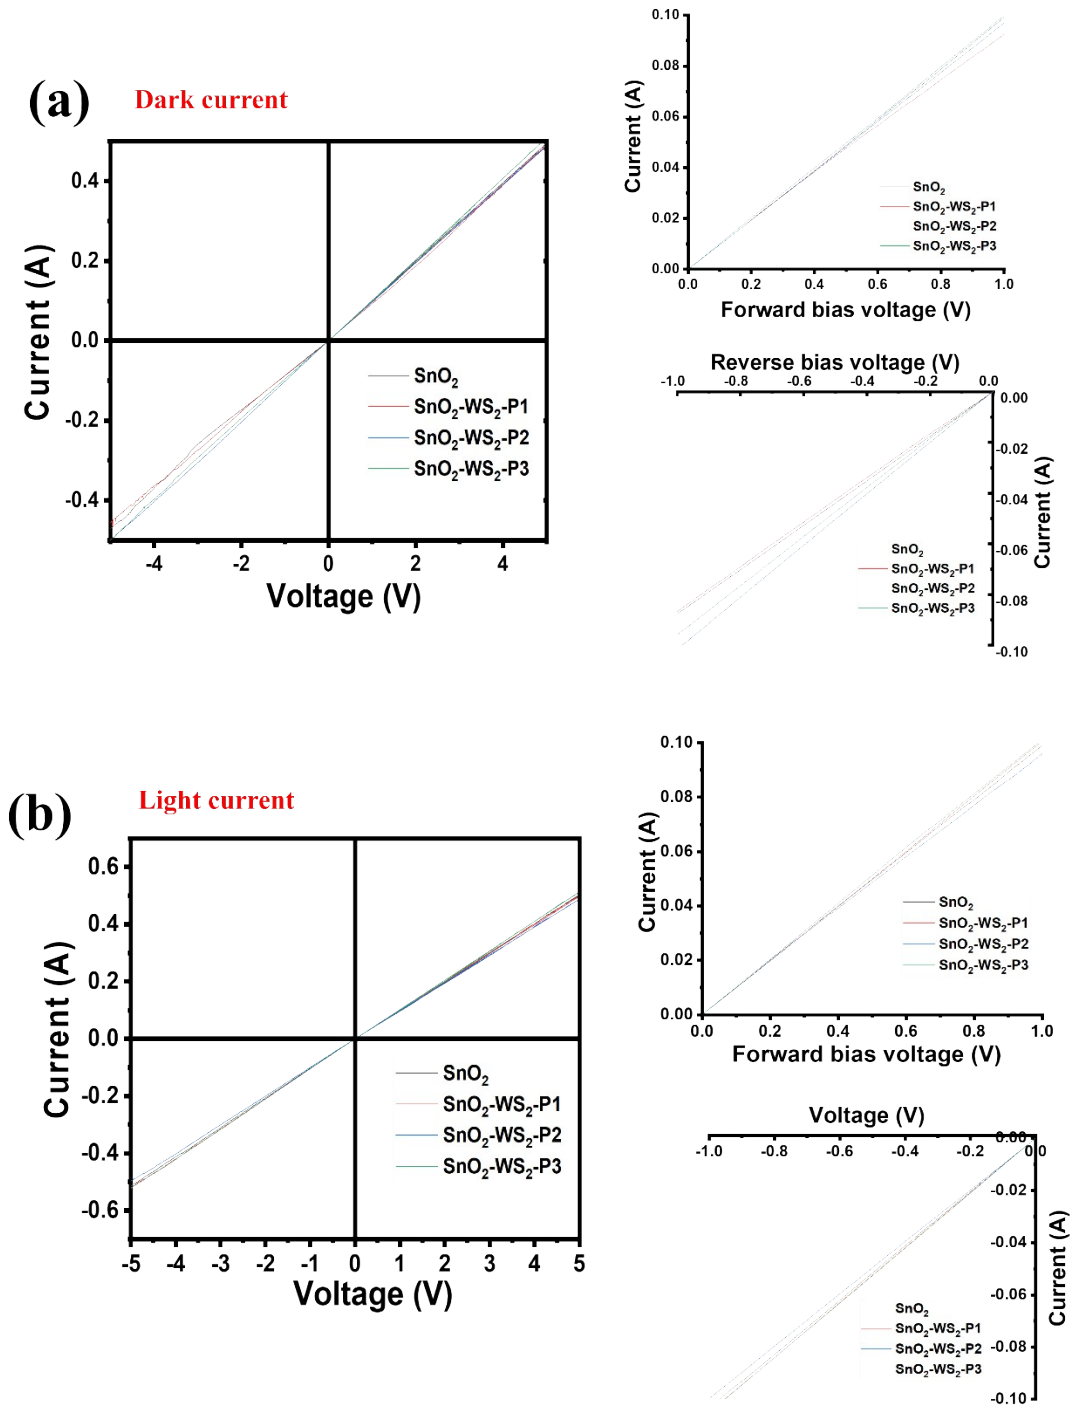

**Fig. S16.** I-V curves of different ETL at (a) a dark environment and (b) under 254 nm irradiation

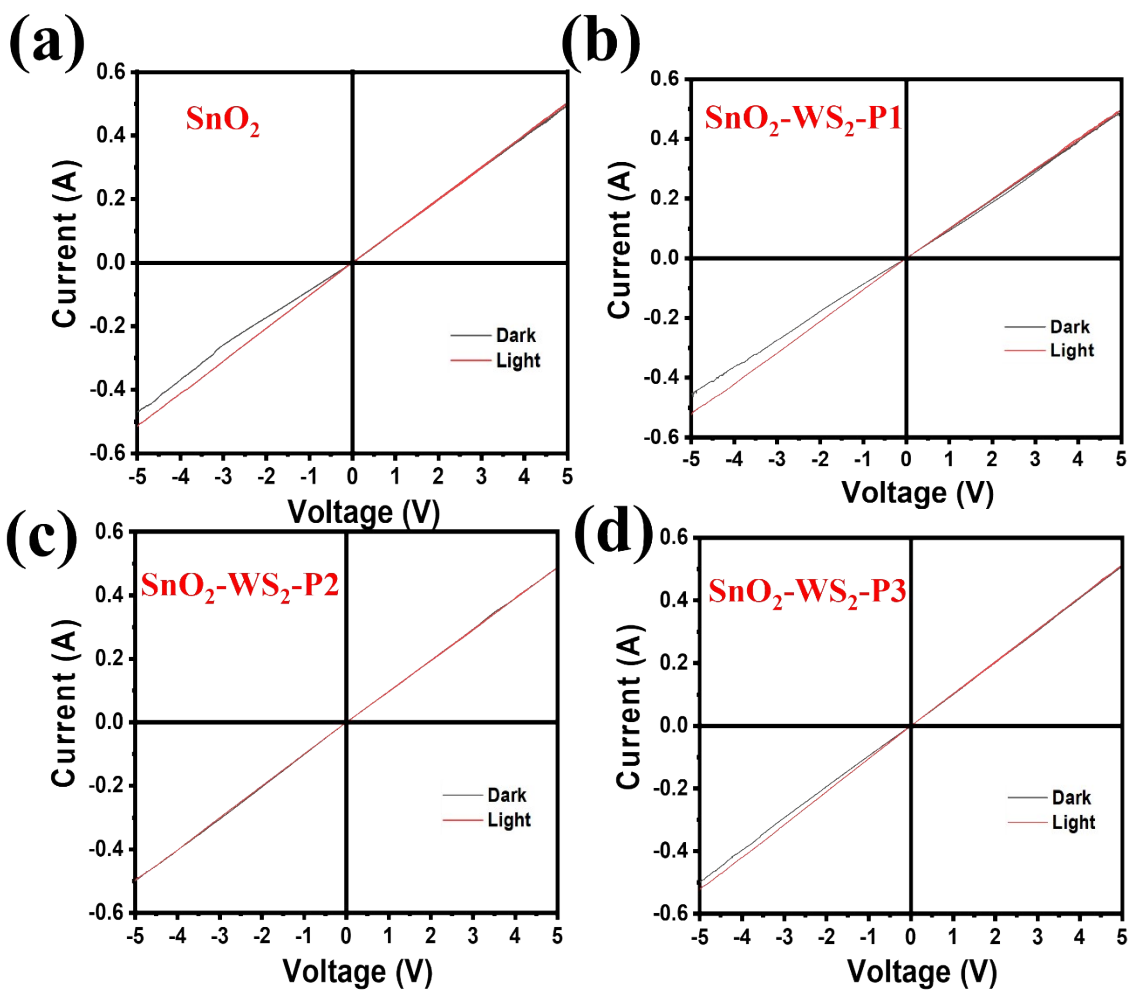

**Fig. S17.** I-V curves of PD devices at different ETL at (a) a dark environment and (b) under 254 nm irradiation

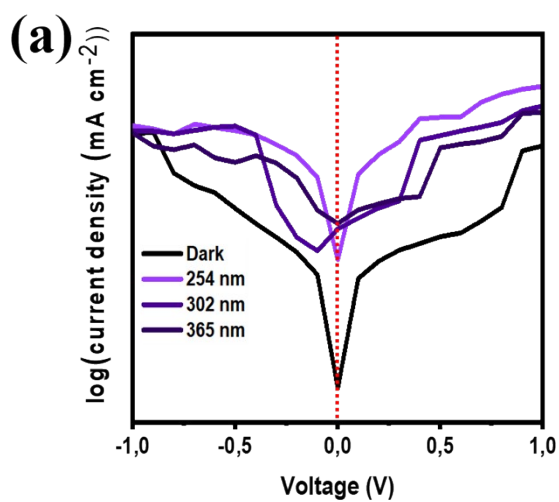

FTO/SnO<sub>2</sub>-WS<sub>2</sub>/Perovskite/spiro-OMeTAD/Au

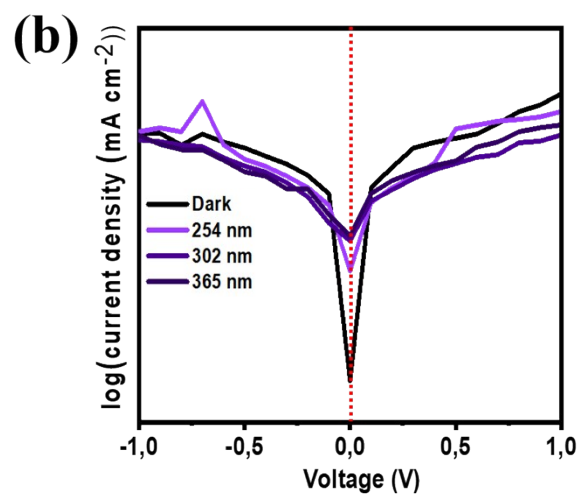

FTO/SnO<sub>2</sub>/Perovskite/spiro-OMeTAD/Au

**Fig. S18.** J-V curves of PD devices at different ETL in a dark environment and under 254 nm, 302 nm, and 365 nm radiation.

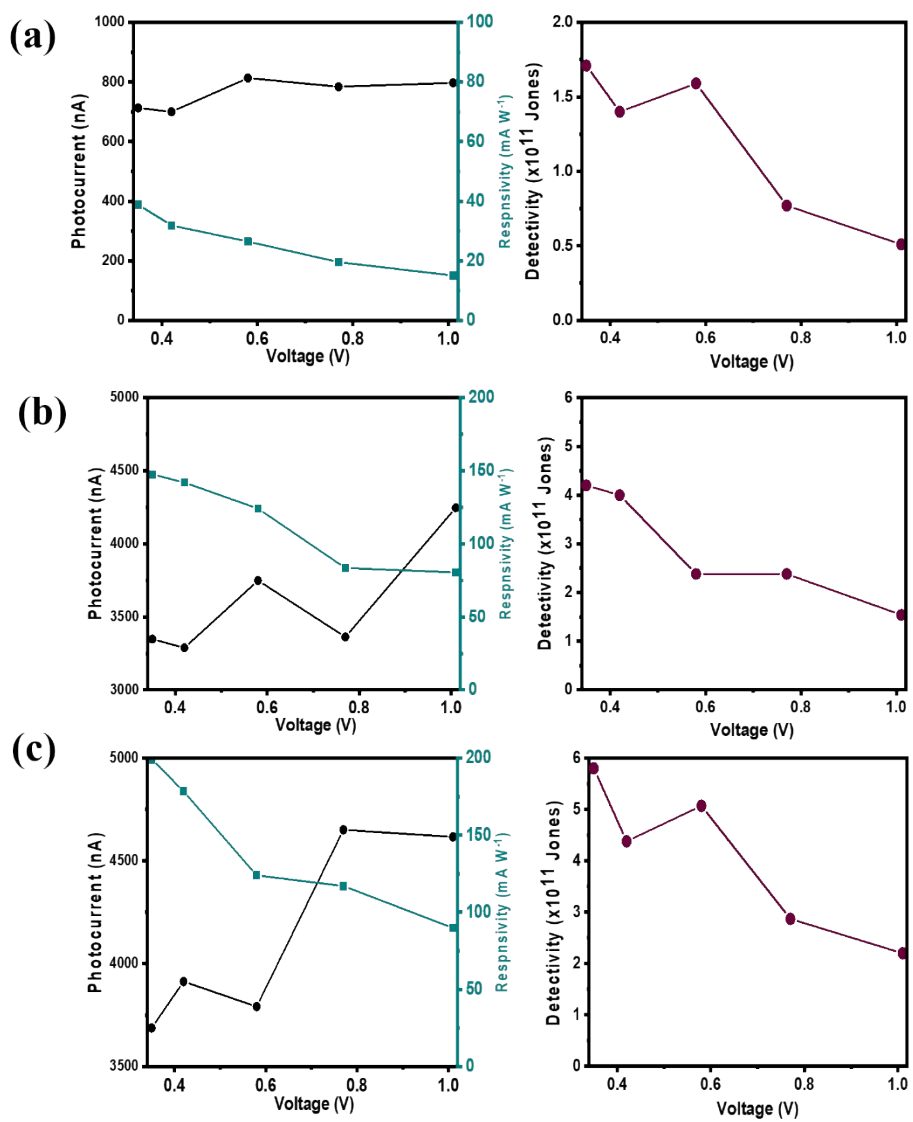

**Fig. S19.** The performance of different PD devices with photocurrent, responsivity, and detectivity of (a) UVC, (b) UVB, and (c) UVA regions.

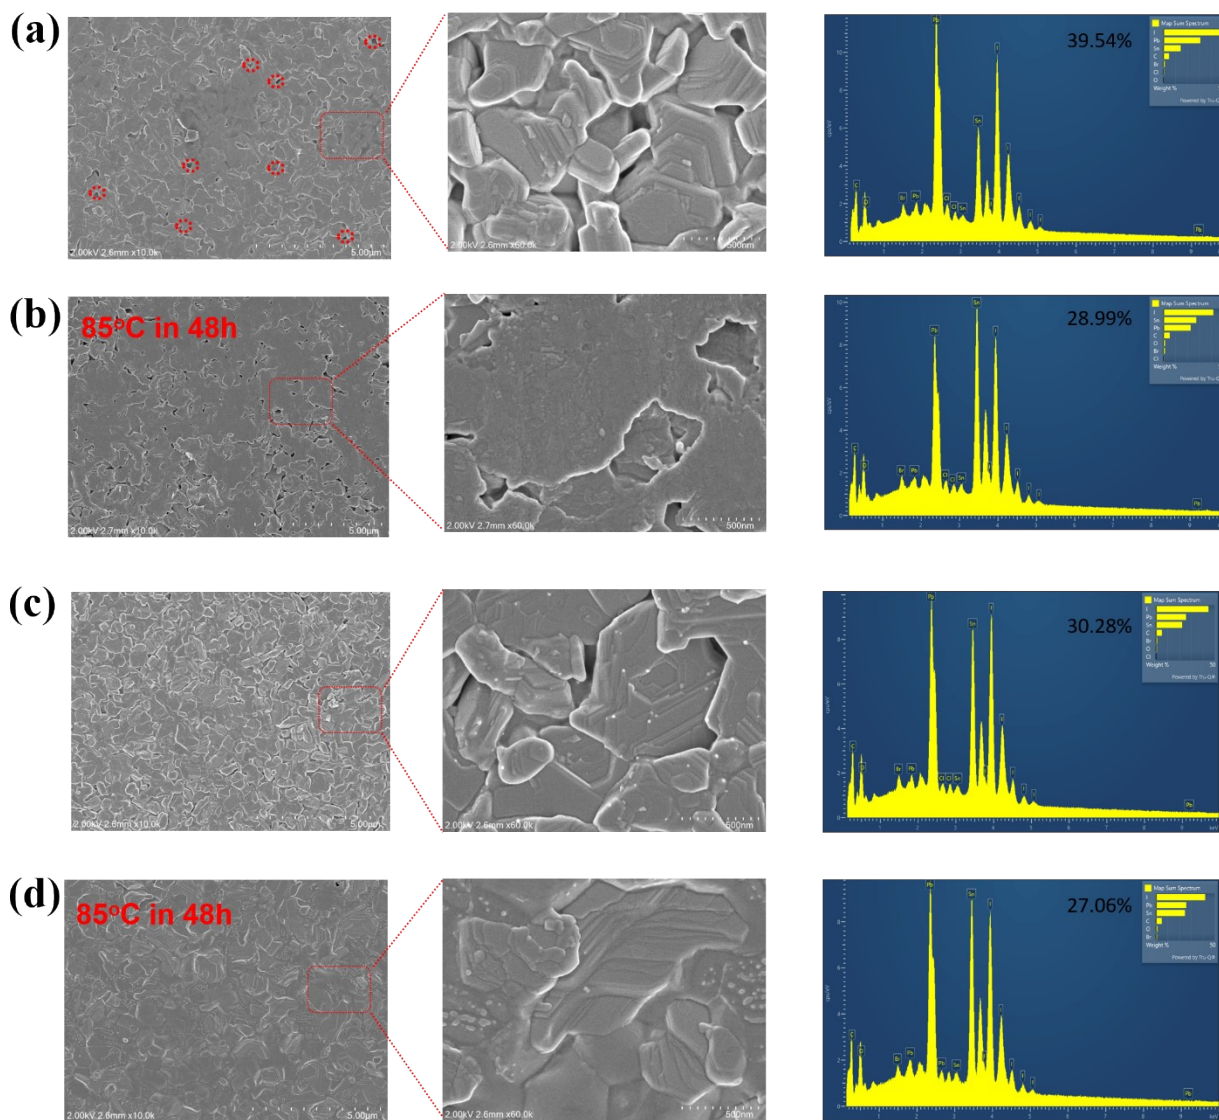

**Fig. S20.** SEM image and EDX analysis of perovskite coating on (a) SnO<sub>2</sub> at normal condition, (b) SnO<sub>2</sub> at 85°C in 48h, (c) SnO<sub>2</sub>-WS<sub>2</sub> at normal condition, and (d) SnO<sub>2</sub>-WS<sub>2</sub> at 85°C in 48h.
